# Supplementary material for: Analysis of striatal transcriptome in mice overexpressing human wild-type alpha-synuclein supports synaptic dysfunction and suggests mechanisms of neuroprotection for striatal neurons
Source: Springer Nature journal article supplement (doi:10.1186/1750-1326-6-83), 2011-01-01
Supplement: Additional file 3 [file 1750-1326-6-83-s3.pdf]

**TableS1: List of Primer sets used for qRT-PCR analyses**

| Gene Symbol    | Gene Name                                                                           | Sense primer 5-----> 3'    | Antisense primer 5-----> 3' | Accession #  | Product length |
|----------------|-------------------------------------------------------------------------------------|----------------------------|-----------------------------|--------------|----------------|
| <i>Ttr</i>     | transthyretin                                                                       | CGTTCATGAATTCGCGGATGT      | TGGTGCTGTAGGAGTATGGGCTGAG   | NM_013697    | 99             |
| <i>Phgdh</i>   | 3-phosphoglycerate dehydrogenase                                                    | GGAGGCTTTCAGTTCTGCTTCTG    | GTCACAGTTGAGCGGGTTTCTTCA    | NM_016966    | 86             |
| <i>Pde7b</i>   | phosphodiesterase 7B                                                                | AGCAGCTGGGCTCCCTCATCTT     | CAGCACACTTCAAGGCGATCTGA     | NM_013875    | 150            |
| <i>Tnnt1</i>   | troponin T1, skeletal, slow                                                         | TCAATGTGCTCTACAACCGCATCAG  | CAGGTGCTGCTGCGCAGTCTCACT    | NM_011618    | 106            |
| <i>Adora2a</i> | adenosine A2a receptor                                                              | GGTCCTCACGCAGGTTCCATCTT    | CAATGATGCCCTTCGCCTCATA      | NM_009630    | 122            |
| <i>Meg3</i>    | Maternally expressed 3 (GTL2, imprinted maternally expressed untranslated mRNA)     | CAATGGCACCCGTGTCCAACCTT    | GAGCCCGACTCACTCATGAGATT     | NT_166318    | 106            |
| <i>Drd2</i>    | dopamine receptor 2                                                                 | AGCCACTCAGATGCTTGCCATTGT   | GGTGGGATGTTGCAGTCACAGTGTA   | NM_010077    | 105            |
| <i>Rasd2</i>   | RASD family, member 2                                                               | CGGCTCTCCATCCTCACAGGAGATG  | GCCTCCATGGCAGGGACCTG        | NM_029182    | 215            |
| <i>Psmb6</i>   | proteasome (prosome, macropain) subunit, beta type 6                                | ATGACTACGTATCGGGAAGGCATGA  | CGCTTACCCCTGACTCCTGAATG     | NM_008946    | 139            |
| <i>Ptprk</i>   | protein tyrosine phosphatase, receptor type, k                                      | AGGTTCTATATGTTGTGGACTC     | TAGGATATTCAAAGTGCAGGGTTC    | NM_008993    | 157            |
| <i>Pttg1</i>   | pituitary tumor-transforming 1                                                      | GCTCCTGATGATGCCTACCAGAA    | GTCATGAGAGGCACGCCATTCA      | NM_01131054  | 128            |
| <i>Nov</i>     | nephroblastoma overexpressed gene                                                   | CAACAGGAATCGCCAGTGTGAGAT   | GGATTTCTTGGTGCAGGACACTTT    | NM_010930    | 124            |
| <i>Med1</i>    | mediator complex subunit 1                                                          | CGGCGTCTGTGACAAATAACCCTAT  | GGGCCACATCCATGAGATCATCAT    | NM_013634    | 105            |
| <i>Stx1a</i>   | syntaxin 1A (brain)                                                                 | AGGGCCGTGTCAGACACCAAGA     | CGATGATGATGCCAGAATCACAC     | NM_016801    | 103            |
| <i>Nr4a2</i>   | nuclear receptor subfamily 4, group A, member 2                                     | ATTGCTGCCCTGGCTATGGTCA     | CAGGTAGTTGGTCCGGTTCAAACC    | NM_001139509 | 141            |
| <i>Psmc4</i>   | proteasome (prosome, macropain) 26S subunit, ATPase, 4                              | GAAGACTATGTGGCCCGTCCAGATA  | CAATGTAAGCGGTCTCACGGACAG    | NM_011874    | 100            |
| <i>Mef2c</i>   | MADS box transcription (myocyte) enhancer factor 2C                                 | CTGGCAGCAGCAGCACCTACATA    | TGGCGCTGGTGTGTGTGTG         | NM_001170537 | 198            |
| <i>Cckbr</i>   | cholecystokinin B receptor                                                          | TGATAATGACAGCGAGACCCAAAGC  | TTGCACGTAGCAGCCATCACTGT     | NM_007627    | 148            |
| <i>Dhcr24</i>  | 24-dehydrocholesterol reductase                                                     | CGCAGCATCTTCTGGGAGCTC      | GCACCAGCATGTCTGCACC         | NM_053272    | 172            |
| <i>Ckmt1</i>   | creatine kinase, mitochondrial 1, ubiquitous                                        | AAAGCGTGGAACTGGAGGAGTGG    | CATCGATGACGAGCTGCACCAG      | NM_009897    | 113            |
| <i>Srebf2</i>  | sterol regulatory element binding factor 2                                          | CAAGTCTGGCGTTCTGAGGAA      | ATGTTCTCTGGCGCAGCT          | NM_033218    | 81             |
| <i>Trh</i>     | thyrotropin releasing hormone                                                       | GGACCTTGGTGTGCTGCTTAGATTCC | CTTGGTTGGCAGCTCGGCCA        | NM_009426    | 164            |
| <i>Bdnf</i>    | brain derived neurotrophic factor                                                   | ATGGGTTACACCAAGGAAGCTG     | CCTTATGAATCGCCAGCCAATTC     | NM_001048139 | 132            |
| <i>Gpx3</i>    | glutathione peroxidase 3                                                            | ACTGCAGAACTCCTGGGCTCACC    | TGCTGACTGTGGTCCGGTGGTAC     | NM_001083929 | 142            |
| <i>Ywhag</i>   | 3-monooxygenase/tryptophan 5-monooxygenase activation protein, $\gamma$ polypeptide | CCACTCTGATCATGCAGCTGCTC    | TGTTGCCTTACCAGCCGTC         | NM_018871    | 84             |
| <i>Gapdh</i>   | Glyceraldehyde-3-phosphate dehydrogenase 1                                          | AGCAACAGGGTGGTGGACCTCA     | GGATAGGGCTCTCTTGCTCAGTG     | NM_008084    | 102            |
| <i>hSNCA</i>   | synuclein, alpha (non A4 component of amyloid precursor) (human)                    | TTGCAGCAGCCACTGGCTTTG      | GGATCCACAGGCATATCTTCCAGAA   | NM_001146055 | 97             |
